# Supplementary material for: The initiator methionine tRNA drives cell migration and invasion leading to increased metastatic potential in melanoma
Source: Oxford University Press journal article supplement (doi:10.1242/bio.019075), 2016-08-19
Supplement: bio019075supp.pdf [file bio019075supp.pdf]

# Supplementary information for Birch et al. - tRNA<sup>Met</sup><sub>i</sub> and invasion

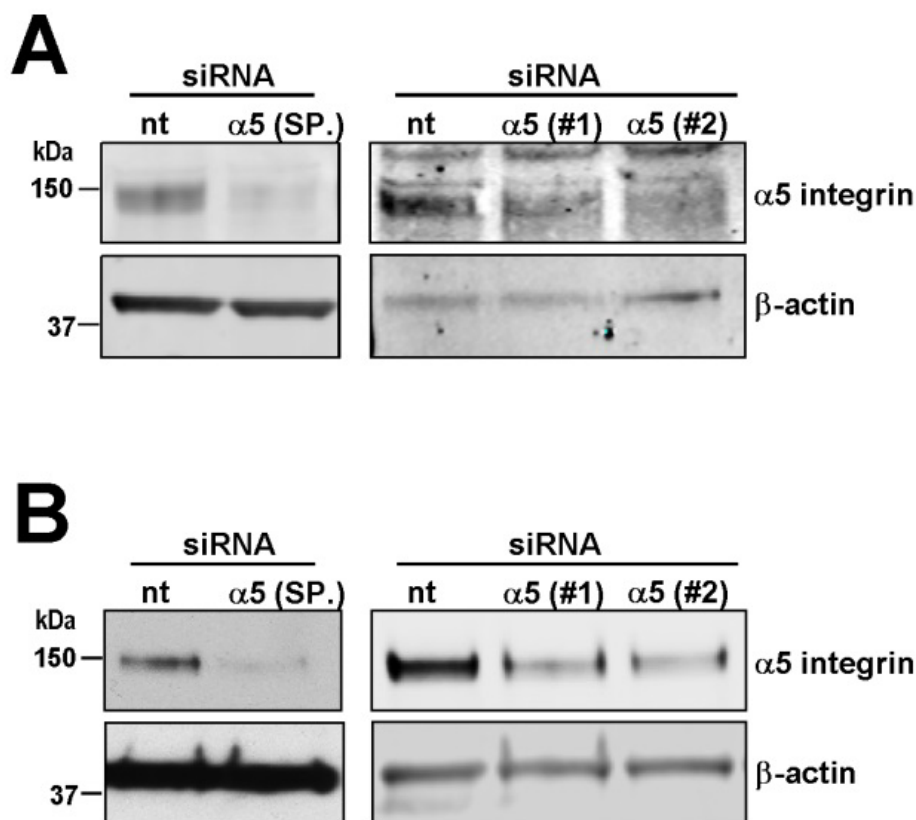

**Fig. S1. Suppression of α5 integrin in iMEFs and WM852 cells using siRNA.**

tRNA<sup>Met</sup><sub>i</sub> overexpressing iMEFs **(A)** or WM852 cells **(B)** were transfected with siRNAs targeting α5 integrin – either using a SMARTPool (SP) or individual siRNA oligonucleotides (#1 & #2). 48 hr following transfection levels of α5 integrin were determined using Western blotting. β-actin was used as loading control.

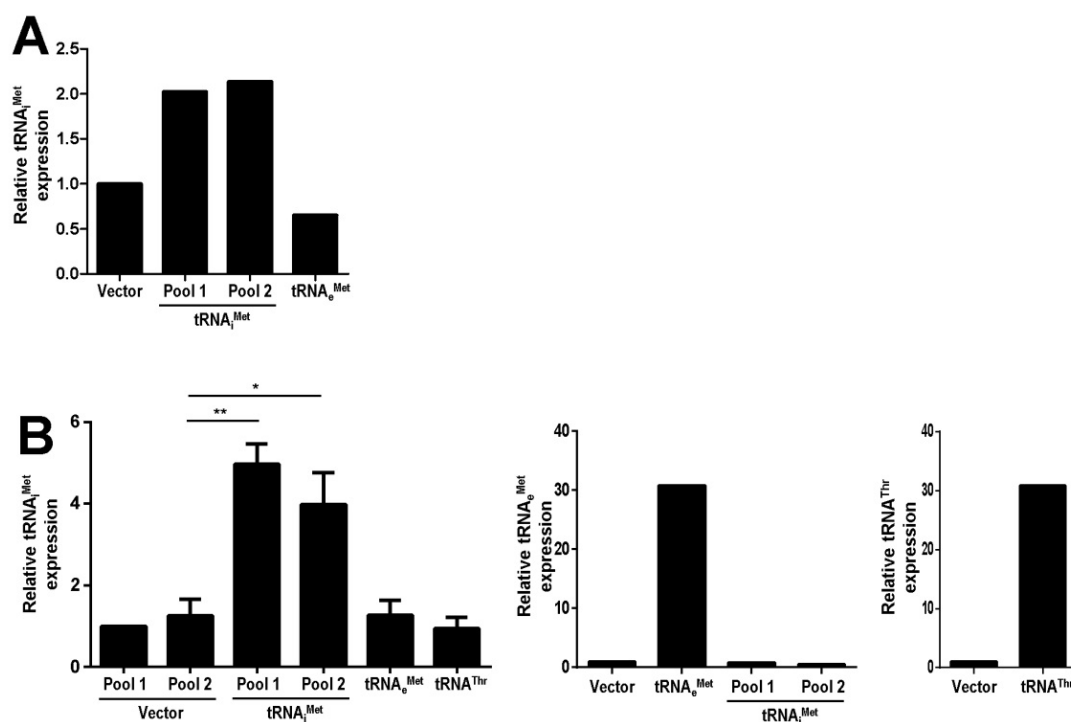

**Fig. S2 Manipulation of tRNA levels in melanoma cells**

**(A)** WM852 cells were transfected with vectors encoding  $tRNA_{iMet}$ ,  $tRNA_{eMet}$ , or an empty vector control (vector) and pools of these were selected for stable expression of these Pol III products. Levels of  $tRNA_{iMet}$  were determined using qPCR. Values are mean.

**(B)** WM266.4 cells were transfected with vectors encoding  $tRNA_{iMet}$ ,  $tRNA_{eMet}$ ,  $tRNA^{Thr}$  or an empty vector control (vector) and pools of these were selected for stable expression of these Pol III products. Levels of  $tRNA_{iMet}$  (left panel),  $tRNA_{eMet}$  (centre panel) and  $tRNA^{Thr}$  (right panel) were determined using qPCR. Values in the left panel are mean  $\pm$  SEM; \*p<0.05, \*\*p<0.01 Mann Whitney test. Values in the centre and right panels are mean.
